# Supplementary material for: L1 retrotransposition is a common feature of mammalian hepatocarcinogenesis
Source: HighWire-hosted journal article supplement (doi:10.1101/gr.226993.117), 2018-04-11
Supplement: Supplemental_Table_S1.xlsx [file Supplemental_Table_S1.xlsx]

## Sheet: Human patient samples
Supplemental Table S1. Statistics for RC-seq and WGS libraries. Tabs correspond to human patient samples and Mdr2 KO mouse samples. Human libraries include those published in a preceding study (Shukla et al., Cell, 2013).
Cancer type	Study	Etiology	Patient ID	Gender	Age	Analysis method	Tissue	Library name	Read pair count	Validated tumor-specific L1 insertions
HCC	Schauer et al.	EtOH	HCC.3	M	82	RC-seq	T	HCC.RC-seq.3T	7538750	0
							NT	HCC.RC-seq.3NT	10808147
			HCC.6	F	56	RC-seq	T	HCC.RC-seq.6T	8896693	0
							NT	HCC.RC-seq.6NT	11427136
			HCC.7	M	74	RC-seq	T	HCC.RC-seq.7T	20395483	0
							NT	HCC.RC-seq.7NT	24423186
			HCC.10	M	61	RC-seq	T	HCC.RC-seq.10T	14495018	0
							NT	HCC.RC-seq.10NT	21405257
			HCC.16	M	61	RC-seq	T	HCC.RC-seq.16T	11259712	2
							NT	HCC.RC-seq.16NT	6727974
			HCC.25	M	58	RC-seq	T	HCC.RC-seq.25T	15983624	0
							NT	HCC.RC-seq.25NT	22618432
			HCC.30	M	59	RC-seq	T	HCC.RC-seq.30T	16779972	0
							NT	HCC.RC-seq.30NT	26533278
			HCC.36	M	51	RC-seq	T	HCC.RC-seq.36T	6569563	0
							NT	HCC.RC-seq.36NT	8411622
			HCC.37	M	52	RC-seq	T	HCC.RC-seq.37T	7980128	0
							NT	HCC.RC-seq.37NT	6712258
			HCC.39	M	60	RC-seq	T	HCC.RC-seq.39T	23627442	0
							NT	HCC.RC-seq.39NT	22753337
			HCC.40	M	51	RC-seq	T	HCC.RC-seq.40T	16089095	0
							NT	HCC.RC-seq.40NT	27954896
			HCC.41	M	59	RC-seq	T	HCC.RC-seq.41T	10129570	0
							NT	HCC.RC-seq.41NT	9154241
			HCC.46	M	80	RC-seq	T	HCC.RC-seq.46T	18407086	0
							NT	HCC.RC-seq.46NT	23886557
			HCC.55	M	58	RC-seq	T	HCC.RC-seq.55T	18992124	0
							NT	HCC.RC-seq.55NT	22164766
			HCC.58	M	54	RC-seq	T	HCC.RC-seq.58T	25765607	5
							NT	HCC.RC-seq.58NT	25982222
			HCC.59	M	52	RC-seq	T	HCC.RC-seq.59T	17638192	0
							NT	HCC.RC-seq.59NT	17840590
			HCC.64	M	64	RC-seq	T	HCC.RC-seq.64T	17883859	0
							NT	HCC.RC-seq.64NT	21908822
			HCC.73	M	69	RC-seq	T	HCC.RC-seq.73T	7874728	0
							NT	HCC.RC-seq.73NT	11412658
			HCC.74	M	66	RC-seq	T	HCC.RC-seq.74T	15458662	0
							NT	HCC.RC-seq.74NT	18246174
			HCC.76	M	69	RC-seq	T	HCC.RC-seq.76T	11225739	0
							NT	HCC.RC-seq.76NT	10974469
			HCC.83	M	54	RC-seq	T	HCC.RC-seq.83T	16081720	0
							NT	HCC.RC-seq.83NT	25358605
			HCC.88	M	58	RC-seq	T	HCC.RC-seq.88T	17240691	0
							NT	HCC.RC-seq.88NT	25076466
			HCC.92	M	59	RC-seq	T	HCC.RC-seq.92T	19295021	0
							NT	HCC.RC-seq.92NT	21303088
			HCC.97	F	67	RC-seq	T	HCC.RC-seq.97T	14829152	0
							NT	HCC.RC-seq.97NT	19386280
			HCC.99	M	45	RC-seq	T	HCC.RC-seq.99T	12083168	1
							NT	HCC.RC-seq.99NT	20011678
		HBV	HCC.71	M	59	RC-seq	T	HCC.RC-seq.71T	14260688	0
							NT	HCC.RC-seq.71NT	19318929
			HCC.121	F	60	RC-seq	T	HCC.RC-seq.121T1	61970059	0
							T	HCC.RC-seq.121T2	73166502
							T	HCC.RC-seq.121T3	52934157
							NT	HCC.RC-seq.121NT1	75580308
							NT	HCC.RC-seq.121NT2	43500710
		HCV	HCC.100	M	75	RC-seq	T	HCC.RC-seq.100T	14906855	0
							NT	HCC.RC-seq.100NT	13158082
			HCC.114	M	43	RC-seq	T	HCC.RC-seq.114T	19261707	0
							NT	HCC.RC-seq.114NT	15662138
			HCC.115	M	73	RC-seq	T	HCC.RC-seq.115T	19222307	0
							NT	HCC.RC-seq.115NT	11738008
			HCC.120	M	49	RC-seq	T	HCC.RC-seq.120T	28585735	0
							NT	HCC.RC-seq.120NT	14632806
			HCC.122	M	87	RC-seq	T	HCC.RC-seq.122T1	68657096	0
							T	HCC.RC-seq.122T2	58269736
							T	HCC.RC-seq.122T3	69725874
							NT	HCC.RC-seq.122NT1	52044567
							NT	HCC.RC-seq.122NT2	73988404
	Shukla et al.	HBV	HCC.15	M	53	RC-seq	T	HCC.RC-seq.15T	30701993	1
							NT	HCC.RC-seq.15NT	33098173
			HCC.32	M	73	RC-seq	T	HCC.RC-seq.32T	42593996	0
							NT	HCC.RC-seq.32NT	48011936
			HCC.47	M	61	RC-seq	T	HCC.RC-seq.47T	25631270	2
							NT	HCC.RC-seq.47NT	35754169
			HCC.48	M	35	RC-seq	T	HCC.RC-seq.48T	15409679	0
							NT	HCC.RC-seq.48NT	19347461
			HCC.62	M	33	RC-seq	T	HCC.RC-seq.62T	22070304	0
							NT	HCC.RC-seq.62NT	18918768
			HCC.86	F	56	RC-seq	T	HCC.RC-seq.86T	38459344	0
							NT	HCC.RC-seq.86NT	62624360
			HCC.89	M	60	RC-seq	T	HCC.RC-seq.89T	16046712	4
							NT	HCC.RC-seq.89NT	25735159
			HCC.95	M	54	RC-seq	T	HCC.RC-seq.95T	17858858	0
							NT	HCC.RC-seq.95NT	22238506
			HCC.106	M	60	RC-seq	T	HCC.RC-seq.106T	27702700	0
							NT	HCC.RC-seq.106NT	36459136
			HCC.116	M	62	RC-seq	T	HCC.RC-seq.116T	25746193	0
							NT	HCC.RC-seq.116NT	37051710
		HCV	HCC.12	M	65	RC-seq	T	HCC.RC-seq.12T	34557178	3
							NT	HCC.RC-seq.12NT	43637807
			HCC.21	M	51	RC-seq	T	HCC.RC-seq.21T	41652019	0
							NT	HCC.RC-seq.21NT	37816827
			HCC.29	M	52	RC-seq	T	HCC.RC-seq.29T	42496663	0
							NT	HCC.RC-seq.29NT	31327199
			HCC.33	F	57	RC-seq	T	HCC.RC-seq.33T	17190457	2
							NT	HCC.RC-seq.33NT	41394468
			HCC.35	F	78	RC-seq	T	HCC.RC-seq.35T	50912019	0
							NT	HCC.RC-seq.35NT	51920350
			HCC.42	F	67	RC-seq	T	HCC.RC-seq.42T	55235694	0
							NT	HCC.RC-seq.42NT	38829063
			HCC.49	M	68	RC-seq	T	HCC.RC-seq.49T	62639915	0
							NT	HCC.RC-seq.49NT	55964259
			HCC.60	M	48	RC-seq	T	HCC.RC-seq.60T	35277878	0
							NT	HCC.RC-seq.60NT	44250827
			HCC.70	M	55	RC-seq	T	HCC.RC-seq.70T	26588571	0
							NT	HCC.RC-seq.70NT	59474695
ICC	Schauer et al.	N/A	ICC.1	M	70	RC-seq	T	ICC.RC-seq.1T	13053854	0
							NT	ICC.RC-seq.1NT	12201574
						WGS	T	ICC.WGS.1T	491118412
							NT	ICC.WGS.1NT	436305453
			ICC.17	M	77	RC-seq	T	ICC.RC-seq.17T	12498869	0
							NT	ICC.RC-seq.17NT	11799958
						WGS	T	ICC.WGS.17T	445298359
							NT	ICC.WGS.17NT	374460349
			ICC.30	M	46	RC-seq	T	ICC.RC-seq.30T	14530463	0
							NT	ICC.RC-seq.30NT	15030495
						WGS	T	ICC.WGS.30T	439982376
							NT	ICC.WGS.30NT	388549438
			ICC.33	F	63	RC-seq	T	ICC.RC-seq.33T	12408090	1
							NT	ICC.RC-seq.33NT	11186231
						WGS	T	ICC.WGS.33T	425413657
							NT	ICC.WGS.33NT	443167410
			ICC.55	M	49	RC-seq	T	ICC.RC-seq.55T	14547673	0
							NT	ICC.RC-seq.55NT	13323828
						WGS	T	ICC.WGS.55T	399104762
							NT	ICC.WGS.55NT	399025380
			ICC.63	M	59	RC-seq	T	ICC.RC-seq.63T	11122857	0
							NT	ICC.RC-seq.63NT	11139808
						WGS	T	ICC.WGS.63T	408015512
							NT	ICC.WGS.63NT	420575123
			ICC.64	F	49	RC-seq	T	ICC.RC-seq.64T	13126198	1
							NT	ICC.RC-seq.64NT	11089816
						WGS	T	ICC.WGS.64T	397369153
							NT	ICC.WGS.64NT	411102056
			ICC.70	M	56	RC-seq	T	ICC.RC-seq.70T	11041576	0
							NT	ICC.RC-seq.70NT	12683479
						WGS	T	ICC.WGS.70T	409914845
							NT	ICC.WGS.70NT	420189816
			ICC.75	F	56	RC-seq	T	ICC.RC-seq.75T	13215485	1
							NT	ICC.RC-seq.75NT	13578608
						WGS	T	ICC.WGS.75T	460583724
							NT	ICC.WGS.75NT	414535252
			ICC.81	F	67	RC-seq	T	ICC.RC-seq.81T	15164872	0
							NT	ICC.RC-seq.81NT	12495871
						WGS	T	ICC.WGS.81T	436429842
							NT	ICC.WGS.81NT	461845122

## Sheet: Mdr2 KO mouse samples
Mouse ID	Sex	Analysis method	Tissue	Library name	Read pair count	Validated tumor-specific L1 insertions
#88218	M	mRC-seq	HCC nodule	Mdr2.mRC-seq.#88218.HCC	4213412	0
			Tail	Mdr2.mRC-seq.#88218.Tail	5916740
#91397	F	mRC-seq	HCC nodule A	Mdr2.mRC-seq.#91397A.HCC	6832554	1
			HCC nodule B	Mdr2.mRC-seq.#91397B.HCC	5910360
			Tail	Mdr2.mRC-seq.#91397.Tail	3325021
		WGS	HCC nodule A	Mdr2.WGS.#91397B.HCC	459342081
			HCC nodule B	Mdr2.WGS.#91397A.HCC	457404308
#91897	F	mRC-seq	HCC nodule	Mdr2.mRC-seq.#91897.HCC	4749884	0
			Tail	Mdr2.mRC-seq.#91897.Tail	3511862
#96109	F	mRC-seq	HCC nodule A	Mdr2.mRC-seq.#96109A.HCC	7109710	2
			HCC nodule B	Mdr2.mRC-seq.#96109B.HCC	5234996
			Tail	Mdr2.mRC-seq.#96109.Tail	3113585
		WGS	HCC nodule A	Mdr2.WGS.#96109A.HCC	446075763
			HCC nodule B	Mdr2.WGS.#96109B.HCC	456338314
#96867	F	mRC-seq	HCC nodule	Mdr2.mRC-seq.#96867.HCC	3932128	0
			Tail	Mdr2.mRC-seq.#96867.Tail	1879303
#97739	F	mRC-seq	HCC nodule	Mdr2.mRC-seq.#97739.HCC	6744149	0
			Tail	Mdr2.mRC-seq.#97739.Tail	3512949
#100862	F	mRC-seq	HCC nodule	Mdr2.mRC-seq.#100862.HCC	6258866	0
			Tail	Mdr2.mRC-seq.#100862.Tail	3143500
#100863	F	mRC-seq	HCC nodule	Mdr2.mRC-seq.#100863.HCC	6728281	0
			Tail	Mdr2.mRC-seq.#100863.Tail	3430661
#103699	F	mRC-seq	HCC nodule	Mdr2.mRC-seq.#103699.HCC	14592566	1
			Tail	Mdr2.mRC-seq.#103699.Tail	3411510
		WGS	HCC nodule	Mdr2.WGS.#103699.HCC	453735303
#103700	F	mRC-seq	HCC nodule	Mdr2.mRC-seq.#103700.HCC	5405779	0
			Tail	Mdr2.mRC-seq.#103700.Tail	5680342
