# Supplementary material for: L1 retrotransposition is a common feature of mammalian hepatocarcinogenesis
Source: HighWire-hosted journal article supplement (doi:10.1101/gr.226993.117), 2018-04-11
Supplement: Supplemental_Table_S3.xlsx [file Supplemental_Table_S3.xlsx]

## Sheet: ICC Sample Mutation Frequencies
Supplemental Table S3. Mutation summary for ICC tumor samples analyzed via WGS.
Sample	SNVs	INDELs	SVs	Total per Mb
ICC.55T	1384	441	15	0.586548
ICC.63T	2251	434	7	0.858145
ICC.30T	3544	745	60	1.38636
ICC.1T	3947	686	51	1.49315
ICC.64T	4135	5320	315	3.11444
ICC.75T	4611	812	62	1.74849
ICC.33T	4852	698	88	1.79726
ICC.17T	5641	719	56	2.04527
ICC.81T	11431	1691	211	4.25024
ICC.70T	15560	4134	8	6.28052
